# Supplementary material for: Plant-Specific Domains and Fragmented Sequences Imply Non-Canonical Functions in Plant Aminoacyl-tRNA Synthetases
Source: MDPI journal article supplement (doi:10.3390/genes11091056), 2020-09-07
Supplement: s1 [file s1]

**Table S1.** The detailed information of maximum likelihood analysis for each phylogenetic tree.

| Phylogenetic Tree                          | Number of taxa<br>/number of sites<br>for phylogenetic analysis | Selected amino acid<br>substitution model | Log likelihood of<br>ML analysis |
|--------------------------------------------|-----------------------------------------------------------------|-------------------------------------------|----------------------------------|
| AsnRS (Fig. 3c)                            | 305/463                                                         | JTT+I+G4                                  | -70776.76054                     |
| AsnRS<br>(Supplementary Fig. S4)           | 17/550                                                          | LG+G4                                     | -11159.22177                     |
| HisRS (Fig. 4c)                            | 163/305                                                         | WAG+I+G4                                  | -20335.48719                     |
| HAL-like domain<br>(Supplementary Fig. S6) | 54/378                                                          | JTT+I+G4+F                                | -18197.03712                     |
| miniHRS<br>(Supplementary Fig. S6)         | 54/449                                                          | JTT+I+G4                                  | -10484.50537                     |
| WHEP domain<br>(Supplementary Fig. S3)     | 183/51                                                          | WAG+G4                                    | -7999.436317                     |
| WHEP domain<br>(Supplementary Fig. S1)     | 16/61                                                           | LG+G4                                     | -1559.710407                     |
