# Supplementary material for: Plant-Specific Domains and Fragmented Sequences Imply Non-Canonical Functions in Plant Aminoacyl-tRNA Synthetases
Source: MDPI journal article supplement (doi:10.3390/genes11091056), 2020-09-07
Supplement: s1 [file s1]

**Table S2.** Rice aaRSs identified in the database. Localization prediction and characteristic primary structures are noted. A total of seven fragmented sequences were identified all from class I.

| ClassI | ID            | length (aa) | localization prediction | primary structure         | ClassII | ID            | length (aa) | localization prediction | primary structure |
|--------|---------------|-------------|-------------------------|---------------------------|---------|---------------|-------------|-------------------------|-------------------|
| ArgRS  | Os01g0158500  | 598         |                         |                           | AlaRS   | Os01g0120400* | 265         | cytosol                 |                   |
|        | Os05g0163000  | 606         | cytosol                 |                           |         | Os06g0245800  | 286         | cp                      |                   |
| CysRS  | Os03g0143300  | 137         |                         | C truncated <sup>‡</sup>  |         | Os10g0182000  | 999         | mt                      |                   |
|        | Os09g0556500  | 569         | mt, cp                  |                           | AsnRS   | Os01g0372700  | 559         | cytosol                 |                   |
|        | Os10g0463100  | 490         | mt, cp                  |                           |         | Os07g0485400  | 553         | mt, cp                  |                   |
| GlnRS  | Os01g0185200  | 796         | cytosol                 |                           |         | Os12g0414500  | 615         | cytosol                 |                   |
|        | Os05g0182800  | 496         | cytosol                 |                           | AspRS   | Os01g0153400  | 384         |                         |                   |
| GluRS  | Os01g0271200  | 715         | cytosol                 |                           |         | Os02g0139600  | 353         | cytosol                 |                   |
|        | Os02g0121000  | 567         | cp                      |                           |         | Os02g0686400  | 549         | cytosol                 |                   |
|        | Os10g0369000  | 713         | cytosol                 |                           | GlyRS   | Os04g0398300  | 292         |                         |                   |
| IleRS  | Os02g0183900  | 249         | cytosol                 | C truncated <sup>‡</sup>  |         | Os06g0103600  | 1068        | cp                      |                   |
|        | Os02g0778200  | 1058        | cp                      |                           |         | Os08g0538000  | 698         | cytosol                 |                   |
|        | Os06g0645400  | 849         | cytosol                 |                           | HisRS   | Os02g0754700  | 487         | mt, cp                  |                   |
| LeuRS  | Os01g0120300  | 794         |                         |                           |         | Os05g0150900  | 788         | cytosol                 |                   |
|        | Os05g0241100  | 322         | cytosol                 | C truncated <sup>‡</sup>  | LysRS   | Os02g0623500  | 586         | mt, cp                  |                   |
|        | Os09g0378300  | 1094        | cytosol                 |                           |         | Os03g0586800  | 602         | cytosol                 |                   |
|        | Os09g0503400  | 1095        | cytosol                 |                           | PheRS   | Os05g0558900  | 596         | cytosol                 |                   |
| MetRS  | Os01g0821800† | 409         | cytosol                 |                           |         | Os10g0400800  | 493         | cytosol                 |                   |
|        | Os03g0209600  | 602         | mt, cp                  |                           | ProRS   | Os12g0533700  | 448         | mt, cp                  |                   |
|        | Os04g0303900† | 259         | cp                      |                           |         | Os07g0165000  | 377         |                         |                   |
|        | Os06g0508700  | 89          |                         | N truncated <sup>§</sup>  |         | Os12g0443700  | 510         | cytosol                 |                   |
|        | Os10g0400100  | 605         | cytosol                 |                           | SerRS   | Os01g0559100  | 425         | cytosol                 |                   |
| TrpRS  | Os01g0743400  | 393         | mt, cp                  |                           |         | Os03g0198400  | 445         | cytosol                 |                   |
|        | Os07g0278400  | 107         | cytosol                 | C truncated <sup>‡</sup>  |         | Os11g0610900  | 509         | mt, cp                  |                   |
|        | Os12g0540900  | 408         | cytosol                 |                           | ThrRS   | Os02g0538000  | 674         | cp                      |                   |
| TyrRS  | Os01g0500900  | 497         | mt, cp                  |                           |         | Os08g0295300  | 745         | mt, cp                  |                   |
|        | Os02g0722001  | 362         | cytosol                 |                           |         |               |             |                         |                   |
|        | Os04g0680550  | 332         | cytosol                 |                           |         |               |             |                         |                   |
|        | Os08g0150800  | 394         | cytosol                 |                           |         |               |             |                         |                   |
|        | Os08g0191800  | 357         | cytosol                 |                           |         |               |             |                         |                   |
|        | Os08g0320000  | 175         | cytosol                 | C truncated‡              |         |               |             |                         |                   |
| ValRS  | Os03g0111700  | 164         | cytosol                 | C truncated <sup>  </sup> |         |               |             |                         |                   |
|        | Os03g0335600  | 539         | cytosol                 |                           |         |               |             |                         |                   |
|        | Os03g0694900  | 1055        | cytosol                 |                           |         |               |             |                         |                   |
|        | Os07g0163500  | 958         | cp                      |                           |         |               |             |                         |                   |
|        | Os10g0506200  | 1050        | cytosol                 |                           |         |               |             |                         |                   |

\*: AlaX ?

†: Arc ?

‡: Incomplete catalytic domain, KMSKS motif missing, Anticodon-binding domain missing

§: Catalytic domain missing

||: Catalytic domain missing, Anticodon-binding domain missing
