# Supplementary material for: Plant-Specific Domains and Fragmented Sequences Imply Non-Canonical Functions in Plant Aminoacyl-tRNA Synthetases
Source: MDPI journal article supplement (doi:10.3390/genes11091056), 2020-09-07
Supplement: s1 [file s1]

**Table S3.** Amino acid sequence identities (%) of WHEP domains among plant AsnRS and GlyRS. AsnRSs are denoted SYNC1, 2, and 3, while GlyRS as AtGRS.

|                          | <i>AT5G56680</i><br>(SYNC1) | <i>AT3G07420</i><br>(SYNC2) | <i>AT1G70980</i><br>(SYNC3) | <i>AT1G29880</i><br>(AtGRS) |
|--------------------------|-----------------------------|-----------------------------|-----------------------------|-----------------------------|
| <i>AT5G56680</i> (SYNC1) |                             | 18.644                      | 71.186                      | 25.424                      |
| <i>AT3G07420</i> (SYNC2) | 18.644                      |                             | 18.644                      | 16.949                      |
| <i>AT1G70980</i> (SYNC3) | 71.186                      | 18.644                      |                             | 28.814                      |
| <i>AT1G70980</i> (AtGRS) | 25.424                      | 16.949                      | 28.814                      |                             |
