# Supplementary material for: Plant-Specific Domains and Fragmented Sequences Imply Non-Canonical Functions in Plant Aminoacyl-tRNA Synthetases
Source: MDPI journal article supplement (doi:10.3390/genes11091056), 2020-09-07
Supplement: s1 [file s1]

Tree scale: 0.01

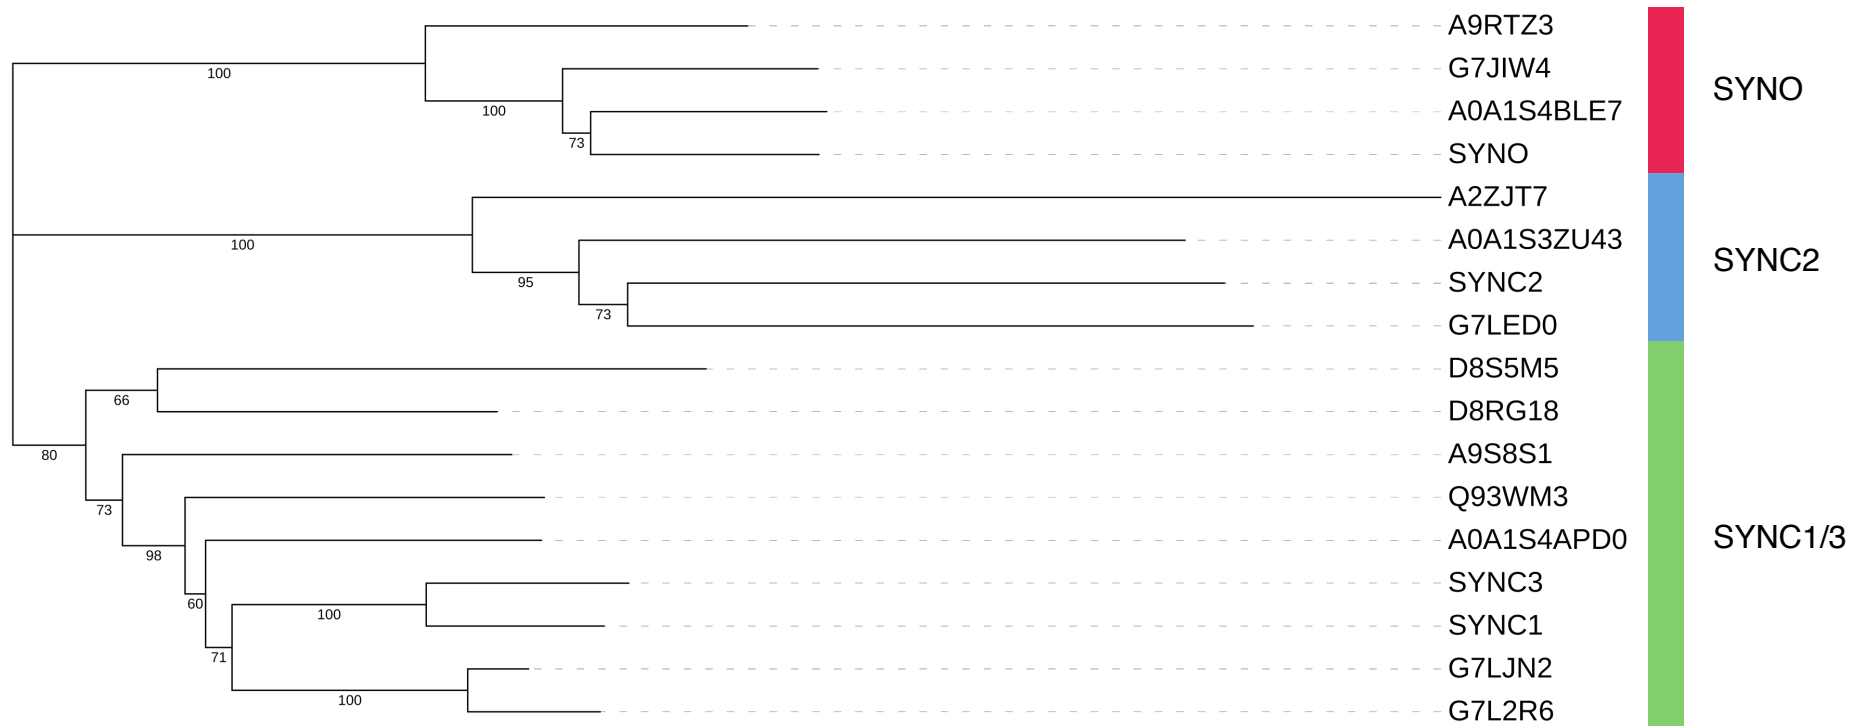

**Fig. S5.** Phylogenetic tree of plant AsnRS full-length sequences obtained from NJ method. AsnRS is classified as SYNC1/3 (cytosolic), SYNC2 (cytosolic), and SYNO (organellar). For sequences other than Arabidopsis AsnRSs, accession numbers assigned in UniProt database are shown. Bootstrap values from 1,000 replicates are shown in percentage.
